# Supplementary material for: Triply responsive soft matter nanoparticles based on poly[oligo(ethylene glycol) methyl ether methacrylate-block-3-phenylpropyl methacrylate] copolymers
Source: Royal Society of Chemistry journal article supplement (doi:10.1039/c6py00254d), 2016-01-01
Supplement: c6py00254d1.pdf [file c6py00254d1.pdf]

## Supporting Information

### **Triply Responsive Soft Matter Nanoparticles based on Poly[oligo(ethylene glycol) methyl ether methacrylate-*block*-3-phenylpropyl methacrylate] Copolymers**

Yiwen Pei,<sup>a,b</sup> Kevin Jarrett,<sup>c</sup> Martin Saunders,<sup>d</sup> Peter J. Roth,<sup>a,b</sup> Craig Buckley<sup>c</sup> and Andrew B. Lowe<sup>a,b \*</sup>

<sup>a</sup> Nanochemistry Research Institute (NRI), Curtin University, Kent Street, Bentley, Perth, WA 6102, Australia.

<sup>b</sup> Department of Chemistry, Curtin University, Kent Street, Bentley, Perth, WA 6102, Australia.

<sup>c</sup> Department of Physics and Astronomy, Curtin University, Kent Street, Bentley, Perth, WA 6102, Australia.

<sup>d</sup> Centre for Microscopy, Characterization and Analysis (CMCA), University of Western Australia, 35 Stirling Highway, Crawley, WA 6009, Australia.

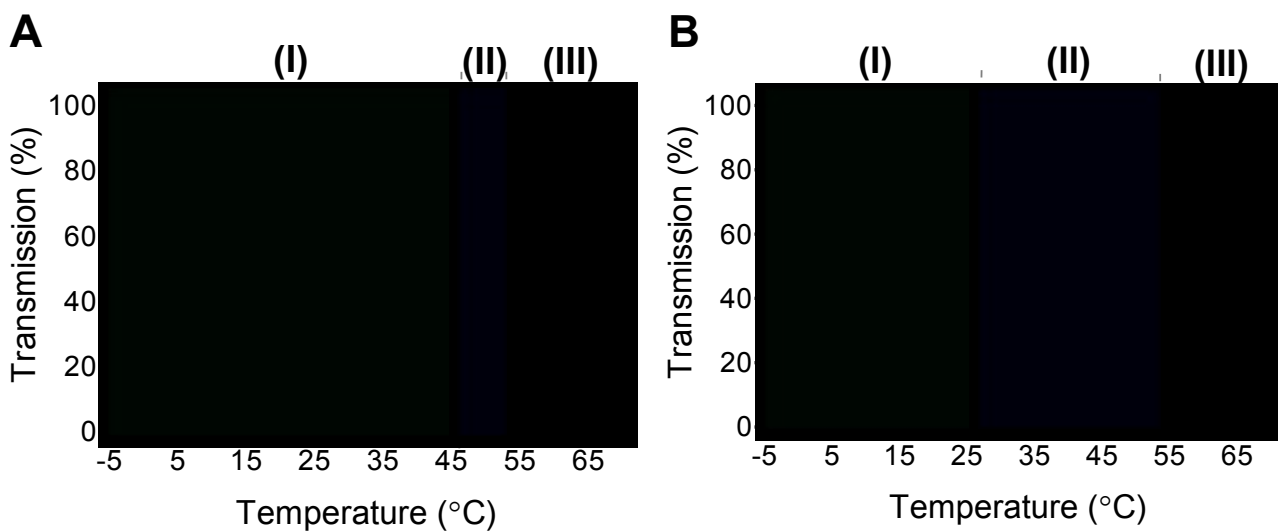

**Figure S1.** Heating (red) and cooling (blue) turbidity curves for A) the p(OEGMA<sub>27</sub>-*b*-PPMA<sub>45</sub>) and B) p(OEGMA<sub>27</sub>-*b*-PPMA<sub>56</sub>) copolymers, measured in EtOH, highlighting the presence of three distinct insolubility/dispersion regimes at 0.7 wt%.

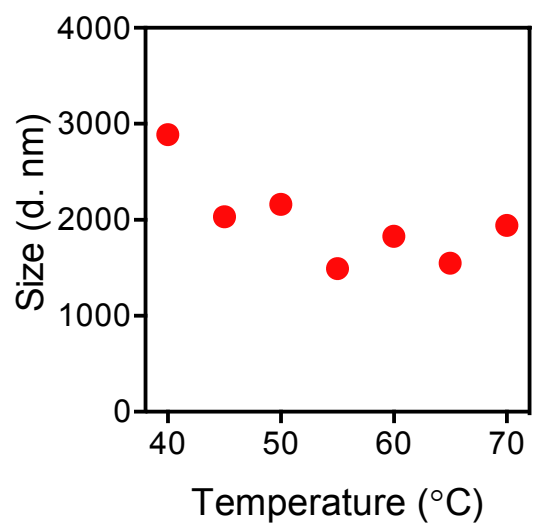

**Figure S2.** DLS measured change in hydrodynamic diameter p(OEGMA<sub>27</sub>-*block*-PPMA<sub>77</sub>) of as a function of increasing temperature.
